# Supplementary material for: Facile intramolecular crosslinking of polymers by metallic coordination in concentrated solutions
Source: Royal Society of Chemistry journal article supplement (doi:10.1039/d0py01606c), 2020-12-10
Supplement: d0py01606c1.pdf [file d0py01606c1.pdf]

## Supporting Information

### Facile Intramolecular Crosslinking of Polymers by Metallic Coordination in Concentrated Solutions

Wei Xu,<sup>ab</sup> Dao Xiang,<sup>ab</sup> Jingjing Xu,<sup>ab</sup> Yilan Ye,<sup>\*c</sup> Dong Qiu,<sup>a</sup> and Zhenzhong Yang<sup>\*c</sup>

*a. Institute of Chemistry, Chinese Academy of Sciences, Beijing 100190, China.*

*b. University of Chinese Academy of Sciences, Beijing 100049, China.*

*c. Department of Chemical Engineering, Tsinghua University, Beijing 100084, China.*

\*E-mail: yangzhenzhong@tsinghua.edu.cn; yilanye@mail.tsinghua.edu.cn

## 1. Experiment

### 1.1 Materials

*N,N*-dimethylformamide (DMF) was purchased from J&K Chemical. Hydrochloric acid (HCl, 37 vol%), aqueous ammonia (NH<sub>3</sub>·H<sub>2</sub>O, 28 wt%), ferric chloride hexahydrate (FeCl<sub>3</sub>·6H<sub>2</sub>O) and ferrous chloride (FeCl<sub>2</sub>) were purchased from Sinopharm Chemical Reagent. 1,5-diiodopentane (DIP), ethylene diamine tetraacetic acid (EDTA) were purchased from TCI. Copper nitrate trihydrate (Cu(NO<sub>3</sub>)<sub>2</sub>·3H<sub>2</sub>O) and P4VP<sub>60k</sub> were purchased from Sigma-Aldrich. PS<sub>93k</sub>-*b*-P4VP<sub>35k</sub> and PS<sub>60k</sub>-*b*-P4VP<sub>32k</sub>-*b*-PEO<sub>39.5k</sub> were purchased from Polymer Source. Dialysis bag (Molecular weight cutoff=3500 D) was purchased from Viskase. All the reagents were used as received.

### 1.2 Intramolecular crosslinking the P4VP contained polymers with metallic ions.

In a typical experiment, P4VP<sub>60k</sub> (100 mg, 1.67×10<sup>-3</sup> mmol) was dissolved in DMF (6.0 mL). 380 μL aqueous HCl (1M, 0.38 mmol) was diluted to 2.0 mL DMF and dropped into the solution for protonation of P4VP at 25 °C within 2 min. 23 mg of copper nitrate trihydrate (Cu(NO<sub>3</sub>)<sub>2</sub>·3H<sub>2</sub>O) (0.095 mmol) was dissolved in 2.0 mL of DMF was dropped under stirring at 800 rpm within 3 min at 25 °C for the crosslinking. The crosslinking was performed at a concentration of 10 mg/mL. The crosslinked single chain nanoparticle (SCNP) of cP4VP was achieved by freeze drying the dispersion after

dialysis against water for 48 h.

### **1.3 Covalent crosslinking the cP4VP with DIP.**

In a typical experiment, the Cu<sup>2+</sup> crosslinked cP4VP<sub>60k</sub> (20 mg) was dispersed in DMF at a concentration of 10 mg/mL. After a given amount of DIP (2.3 μL, 0.015 mmol) was fed, the dispersion was stirred at 60 °C for 4 h. The DIP crosslinked SCNP was achieved by freeze drying after the dialysis.

### **1.4 Decomplexation of the cP4VP with EDTA.**

In a typical experiment, the Cu<sup>2+</sup> crosslinked cP4VP<sub>60k</sub> (20 mg) was dispersed in DMF at a concentration of 10 mg/mL. EDTA solution in water (pH=8) (10 mL, 40 mg/mL) was fed and stirred for 2 h. After dialysis, the precipitation in the dialysis bag was washed by aqueous NaOH and water for 3 times. The cP4VP nanoparticles were recovered into polymer chains after freeze-drying.

### **1.5 Synthesis of the composite SCNP of cP4VP@Fe<sub>3</sub>O<sub>4</sub>.**

P4VP<sub>60k</sub> (20 mg) was dissolved in DMF (2.0 mL) and degassed with nitrogen for 1 h. After the protonation with aqueous HCl in DMF at a molar ratio of 0.4:1.0, the mixture of FeSO<sub>4</sub>·7H<sub>2</sub>O (3.0 mg) and FeCl<sub>3</sub>·6H<sub>2</sub>O (5.2 mg) (molar ratio 1.0:1.8) was fed for the intramolecular crosslinking. After the dispersion was heated to 80 °C, a desired amount of aqueous ammonia was fed to adjust pH~10. After stirring for 1 h, the composite SCNP of cP4VP@Fe<sub>3</sub>O<sub>4</sub> was achieved after collection with a magnet.

### **1.6 Characterization.**

Size and zeta potential were measured in DMF by dynamic light scattering at 25 °C on Malvern Zeta sizer Nano ZS90 with the measurement range of 0.3 nm-5 μm. All the samples were diluted to 1 mg/mL and measured without filtration. TEM characterization was performed on JEOL 1011 operating at 100 kV. The sample was diluted to 1 mg/mL with DMF and dropped onto the ultra-thin carbon film. Size statistical analysis of the TEM images was conducted by the Image J among 180 SCNP samples.

## 2. Results and Discussion

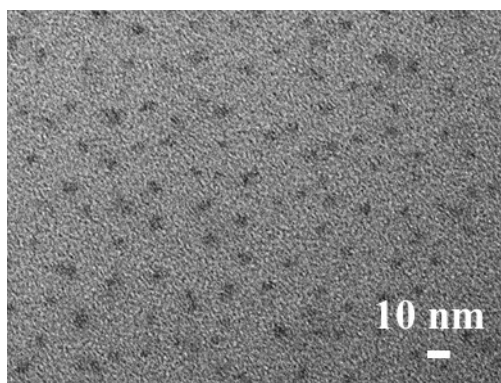

**Figure S1.** TEM image of the cP4VP<sub>60k</sub> after the intramolecular crosslinking with Cu<sup>2+</sup> in an extremely dilute solution at 0.01 mg/mL.

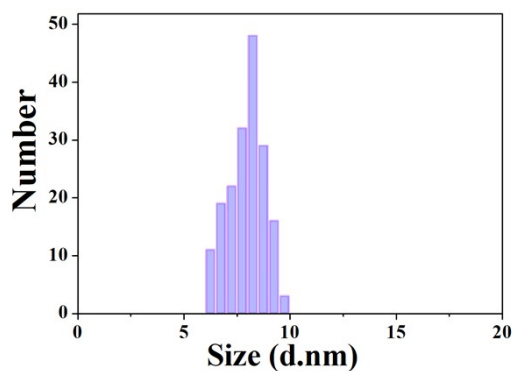

**Figure S2.** Image J statistical diameter of cP4VP<sub>60k</sub> coordinated with Cu<sup>2+</sup>.

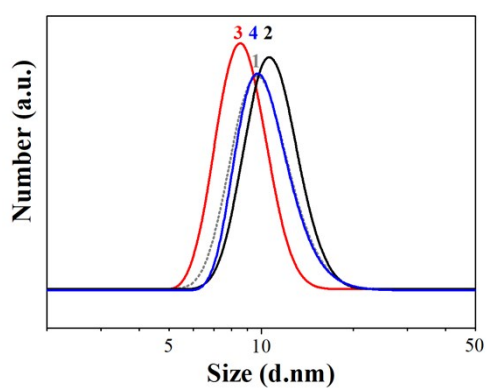

**Figure S3.** DLS traces of (1) P4VP<sub>60k</sub> in DMF, (2) the protonated P4VP<sub>60k</sub> at a degree of 40%, (3) cP4VP<sub>60k</sub> after crosslinking with Cu<sup>2+</sup> and (4) the protonated P4VP<sub>60k</sub> in the presence of LiBr in DMF solution (the concentration of LiBr in DMF was 50 mmol/L).

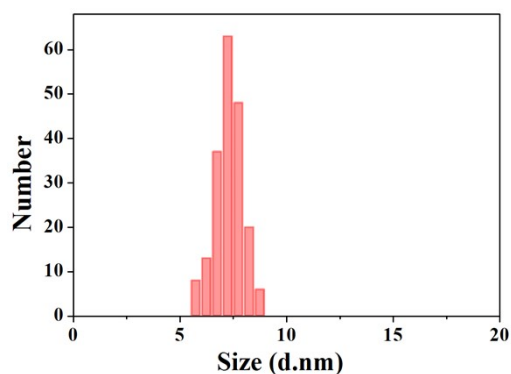

**Figure S4.** Image J statistical diameter of the cP4VP<sub>60k</sub> coordinated with Fe<sup>3+</sup>.

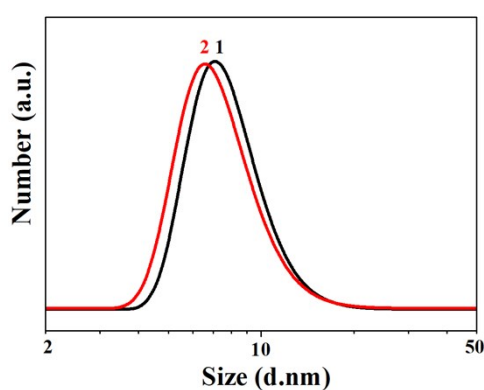

**Figure S5.** DLS traces of (1) the cP4VP<sub>60k</sub> after the electrostatic-mediated intramolecular crosslinking with Fe<sup>2+</sup>/Fe<sup>3+</sup> at the polymer concentration of 10 mg/mL and (2) the derived cP4VP@Fe<sub>3</sub>O<sub>4</sub> composite nanoparticle.

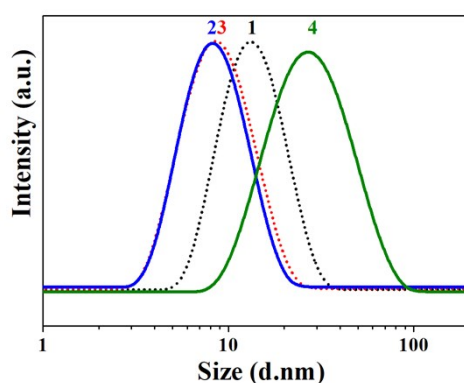

**Figure S6.** Intensity versus size DLS traces of (1) P4VP<sub>60k</sub>, (2) the reference SCNP formed in the dilute solution, after electrostatic-mediated intramolecular crosslinking the P4VP<sub>60k</sub> with Cu<sup>2+</sup> at varied contents: (3) 3% and (4) 4%.

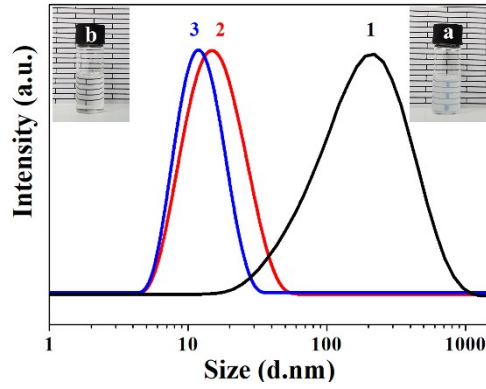

**Figure S7.** (1) DLS trace of the turbid system (a) at a higher (70%) protonation of P4VP<sub>60k</sub> in DMF; (2) the transparent solution (b) after feeding LiBr to the turbid system and (3) after the intramolecular crosslinking with Cu<sup>2+</sup>.

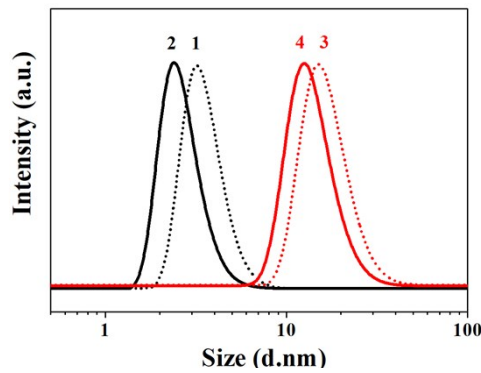

**Figure S8.** DLS traces of (1) P4VP<sub>6k</sub> and (2) after the intramolecular crosslinking with 10% of Cu<sup>2+</sup>; (3) P4VP<sub>170k</sub> and (4) after the intramolecular crosslinking with 10% of Cu<sup>2+</sup>. The molar content of H<sup>+</sup> was fixed at 40%.

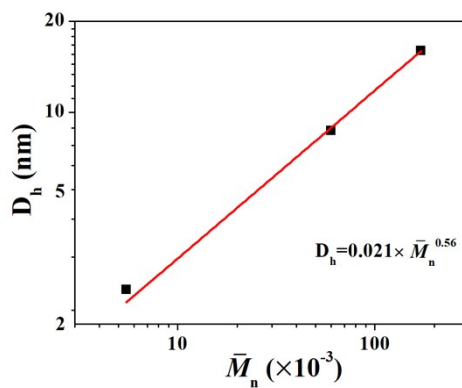

**Figure S9.** Hydrodynamic diameter ( $D_h$ ) dependence of the derived cP4VP on number average molecular weight ( $M_n$ ) of P4VP.

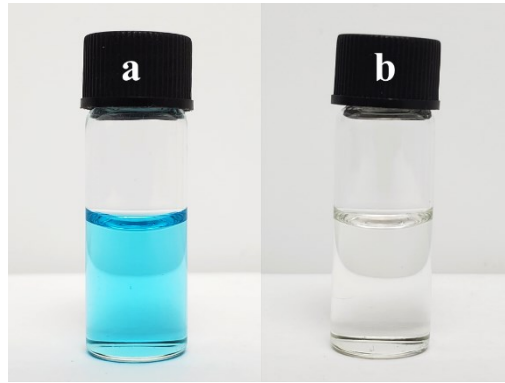

**Figure S10.** (a)  $\text{Cu}^{2+}$  crosslinked  $\text{cP4VP}_{60\text{k}}$  dispersion in DMF and (b) after feeding EDTA and dialysis.

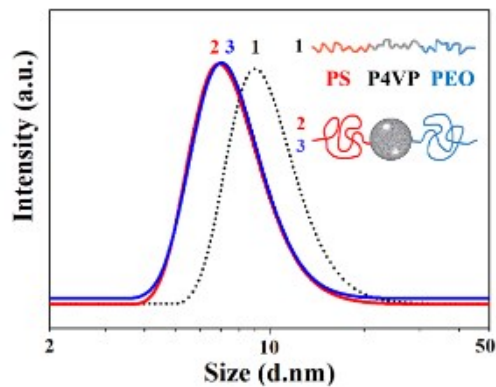

**Figure S11.** DLS traces of (1)  $\text{PS}_{60\text{k}}\text{-}b\text{-P4VP}_{32\text{k}}\text{-}b\text{-PEO}_{39.5\text{k}}$  in DMF and the two SCNPs by the electrostatic-mediated crosslinking at polymer concentrations (mg/mL): (2) 50, (3) 80.

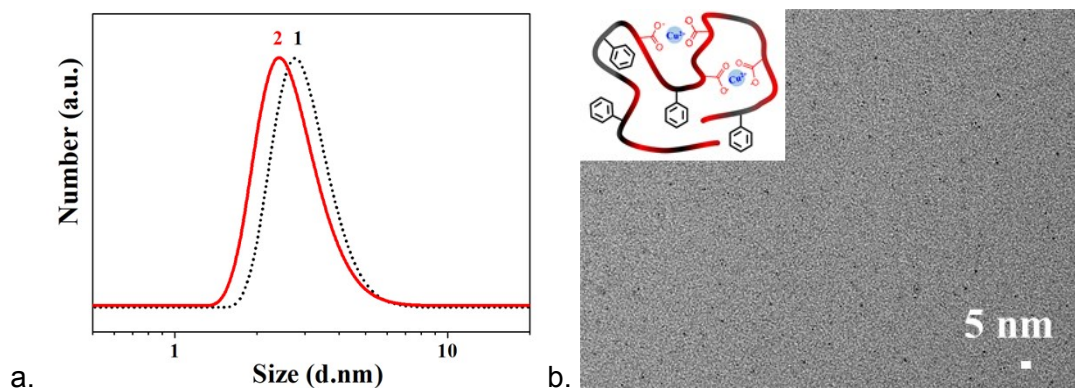

**Figure S12.** (a) DLS traces of (1) the SMA in DMF and (2) the  $\text{cSMA}$  SCNP after the electrostatic-mediated intramolecular crosslinking with  $\text{Cu}^{2+}$  at the polymer concentration of 10 mg/mL; (b) TEM image of the  $\text{cSMA}$  SCNP and the inset scheme.
